# Supplementary material for: Modeling type 2 diabetes-like hyperglycemia in C. elegans on a microdevice
Source: Royal Society of Chemistry journal article supplement (doi:10.1039/c5ib00243e), 2015-12-01
Supplement: c5ib00243e1.pdf [file c5ib00243e1.pdf]

## Supplementary Information

Fig. 1 high throughput figure of worms

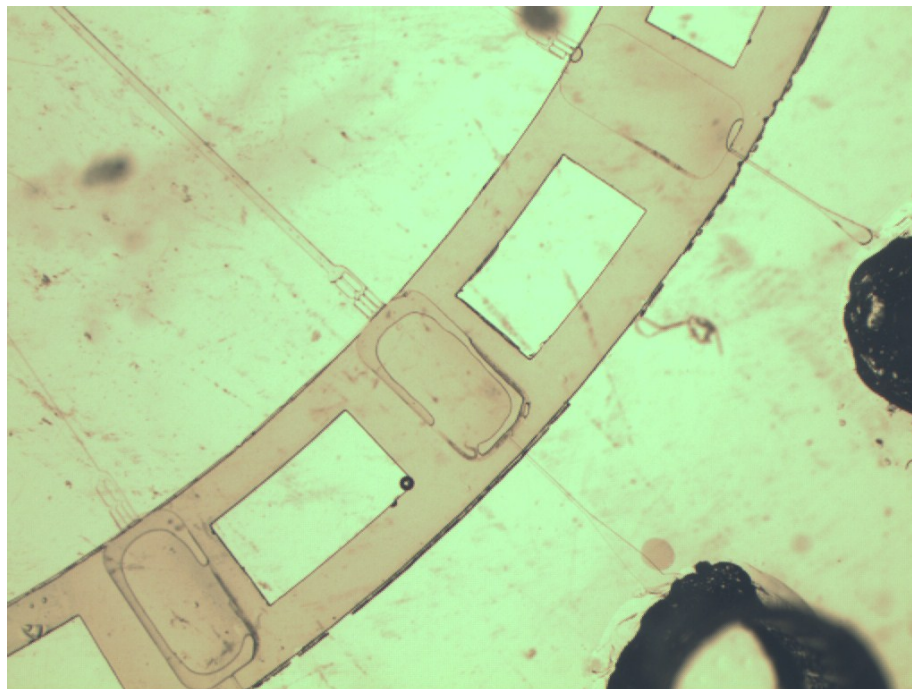

Table 1. The survival rate of N2 worms under different condition

| Days | Control |       |          | 100mM |       |          | 200mM |       |             |
|------|---------|-------|----------|-------|-------|----------|-------|-------|-------------|
|      | Dead    | Alive | % Alive  | Dead  | Alive | % Alive  | Dead  | Alive | % Alive     |
| 1    |         | 34    | 1        | 1     | 31    | 1        | 1     | 31    | 1           |
| 2    |         | 34    | 1        | 2     | 31    | 1        | 2     | 31    | 1           |
| 3    |         | 34    | 1        | 3     | 31    | 1        | 3     | 31    | 1           |
| 4    |         | 34    | 1        | 4     | 31    | 1        | 4     | 31    | 1           |
| 5    |         | 34    | 1        | 5     | 31    | 1        | 5     | 31    | 1           |
| 6    |         | 34    | 1        | 6     | 29    | 0.935484 | 6     | 31    | 1           |
| 7    |         | 34    | 1        | 7     | 26    | 0.83871  | 7     | 30    | 0.967741935 |
| 8    |         | 34    | 1        | 8     | 26    | 0.83871  | 8     | 28    | 0.903225806 |
| 9    |         | 34    | 1        | 9     | 22    | 0.709677 | 9     | 25    | 0.806451613 |
| 10   | 3       | 31    | 0.911765 | 10    | 22    | 0.709677 | 10    | 15    | 0.483870968 |
| 11   | 2       | 29    | 0.852941 | 11    | 17    | 0.548387 | 11    | 14    | 0.451612903 |
| 12   | 3       | 26    | 0.764706 | 12    | 14    | 0.451613 | 12    | 8     | 0.258064516 |
| 13   | 1       | 25    | 0.735294 | 13    | 9     | 0.290323 | 13    | 4     | 0.129032258 |
| 14   | 2       | 23    | 0.676471 | 14    | 3     | 0.096774 | 14    | 0     | 0           |
| 15   | 3       | 20    | 0.588235 | 15    | 2     | 0.064516 | 15    |       |             |
| 16   | 1       | 19    | 0.558824 | 16    | 1     | 0.032258 | 16    |       |             |
| 17   | 2       | 17    | 0.5      | 17    | 0     | 0        | 17    |       |             |
| 18   | 6       | 11    | 0.323529 | 18    | 0     | 0        | 18    |       |             |
| 19   | 5       | 6     | 0.176471 | 19    |       |          | 19    |       |             |
| 20   | 3       | 3     | 0.088235 | 20    |       |          | 20    |       |             |
| 21   | 3       | 0     | 0        | 21    |       |          | 21    |       |             |

Table 2. The mean lifespan of N2 worms under different condition

|         | AVERAGE     | ERROR BAR  | TTEST     |
|---------|-------------|------------|-----------|
| Control | 16.17647059 | 3.56303062 |           |
| 100mM   | 11.51612903 | 2.94245892 | 5.716E-08 |
| 200mM   | 11.24137931 | 1.76585011 | 2.72E-08  |



Table 4. The fluorescence of VS29 under different conditions

| I/A      |          |          |          |          |          |          |          |          |          |          |          |
|----------|----------|----------|----------|----------|----------|----------|----------|----------|----------|----------|----------|
| 0mM      |          |          |          | 100mM    |          |          |          | 200mM    |          |          |          |
| 1d       | 3d       | 5d       | 7d       | 1d       | 3d       | 5d       | 7d       | 1d       | 3d       | 5d       | 7d       |
| 29.23496 | 26.09347 | 28.01469 | 23.4133  | 31.31962 | 29.42771 | 37.18366 | 20.5474  | 32.36065 | 28.18692 | 38.6416  | 27.14428 |
| 27.21227 | 21.09105 | 23.11127 | 21.90993 | 31.72653 | 24.64149 | 27.50879 | 31.9781  | 30.83155 | 26.46999 | 28.16318 | 27.25457 |
| 31.07541 | 22.98146 | 20.58853 | 23.1285  | 29.26595 | 31.95235 | 27.81321 | 23.25951 | 43.62045 | 30.49949 | 24.81315 | 24.94485 |
| 30.86692 | 27.37925 | 24.00677 | 21.43546 | 33.96785 | 26.60533 | 21.14612 | 26.17433 | 31.83975 | 24.43153 | 25.55166 | 25.91107 |
| 30.28427 | 27.97871 | 23.21007 | 22.96928 | 32.58503 | 26.88796 | 28.1917  | 21.01403 | 30.55348 | 23.49601 | 24.22389 | 25.18169 |
| 27.03734 | 24.02439 | 19.05114 | 18.5082  | 33.91212 | 24.2234  | 25.29821 | 27.67118 | 31.52267 | 22.68212 | 24.32452 | 26.92819 |
| 35.69506 | 32.22468 | 18.93524 | 26.32505 | 30.89457 | 30.59592 | 21.91672 | 25.93845 | 27.14687 | 21.94306 | 26.14431 | 24.81007 |
| 33.70572 | 26.0585  | 20.58125 | 26.40658 | 28.07515 | 29.68104 | 24.27532 | 24.39424 | 28.8132  | 22.84427 | 22.32498 | 28.35664 |
| 29.91013 | 29.42349 | 20.0532  | 19.51789 | 34.55302 | 24.86908 | 21.84812 | 21.06542 | 36.19432 | 26.58046 | 37.5488  | 24.22798 |
| 26.68485 | 25.50488 | 19.59362 | 24.02663 | 29.88922 | 24.67792 | 22.04387 | 23.88818 | 30.01381 | 27.2221  | 25.31588 | 22.82887 |
| 31.95244 | 26.0878  | 19.75537 | 19.45257 | 32.67388 | 24.52013 | 19.84805 | 22.92911 | 28.50138 | 26.07836 | 26.14903 | 27.47054 |
| 31.0742  | 23.05031 | 19.2112  | 23.41955 | 32.59901 | 32.63995 | 20.69967 | 28.19904 | 30.71063 | 32.08194 | 25.54102 | 35.08257 |
| 31.79699 | 24.30608 | 18.98632 | 27.36717 | 32.74746 | 33.7432  | 21.31824 | 23.10643 | 33.64856 | 35.96553 | 39.89298 | 28.07949 |
| 32.50629 | 25.63978 | 19.98745 | 20.04912 | 29.36509 | 28.25631 | 19.11922 | 20.30968 | 33.06819 | 31.46153 | 26.64753 | 22.80012 |
| 34.81011 | 30.83333 | 19.82488 | 20.19644 | 36.44404 | 32.57601 | 23.55684 | 23.19389 | 28.04966 | 32.12389 | 24.30282 | 25.86543 |
| 33.47669 | 23.59099 | 19.18384 | 23.60952 | 27.64517 | 30.75606 | 21.86203 | 23.02462 | 32.86831 | 22.21056 | 22.60809 | 25.41501 |
| 28.35422 | 25.05499 | 18.52552 | 19.93164 | 36.3253  | 27.26217 | 19.9247  | 22.04915 | 32.12461 | 33.72935 | 24.95831 | 21.33611 |
| 29.11168 | 22.13395 | 18.80439 | 23.27587 | 34.53774 | 36.15465 | 19.62042 | 23.34431 | 29.16525 | 23.96479 | 22.9065  | 23.94814 |
| 31.59269 | 24.94814 | 19.12139 | 20.23034 | 33.65268 | 25.33429 | 22.02744 | 23.16862 | 32.86319 | 22.84861 | 30.43223 | 27.28662 |
| 29.55602 | 25.36971 | 24.83296 | 26.36226 | 37.01132 | 28.73691 | 21.92459 | 20.28642 | 32.76623 | 32.69406 | 23.66026 | 21.59116 |
| 29.49966 | 27.13519 | 19.37983 | 23.75588 | 34.96614 | 27.64565 | 22.84007 | 20.15312 | 36.50211 | 25.75877 | 22.00014 | 24.32662 |
| 32.23436 | 22.80235 | 18.71749 | 22.06716 | 30.73285 | 24.77989 | 22.10568 | 20.0591  | 29.27302 | 22.80109 | 23.41241 | 19.71928 |
| 31.68853 | 22.34463 | 18.65238 | 19.54169 | 30.97642 | 37.77689 | 19.58576 | 21.72548 | 32.20184 | 27.82524 | 32.67805 | 19.86471 |
| 25.74684 | 21.83356 | 22.35267 | 18.67638 | 31.91005 | 26.02239 | 22.30163 | 21.51538 | 33.26793 | 23.39393 | 23.63634 | 19.60612 |
| 29.50065 | 23.09663 | 19.42332 | 23.61432 | 36.59458 | 34.63037 | 25.89883 | 34.71155 | 28.61076 | 23.6969  | 24.83585 | 21.48009 |
| 27.96455 | 29.22181 | 22.02203 | 18.7029  | 33.45135 | 20.42585 | 25.68108 | 31.95797 | 28.5036  | 26.96169 | 24.23022 | 23.99114 |
| 31.64053 | 28.26163 | 21.10003 | 22.60056 | 35.43767 | 24.44603 | 22.69364 | 28.76328 | 30.58698 | 24.59277 | 23.77115 | 24.74758 |
| 33.9244  | 36.5333  | 19.65105 | 30.64373 | 28.57602 | 22.10666 | 26.42935 | 23.0787  | 21.16433 | 26.68804 | 24.23022 | 23.12559 |
| 29.23496 | 21.29956 | 19.17056 | 26.78457 | 31.69321 | 38.30333 | 19.56076 | 20.01895 | 33.50812 | 35.48056 | 23.77115 | 19.41692 |
| 27.21499 | 19.36131 | 22.09157 | 30.35468 | 34.03791 | 35.79772 | 22.36772 | 19.172   | 31.50489 | 26.53474 | 22.01944 | 28.36228 |
| 22.62184 | 22.50475 | 19.82484 | 37.50578 | 33.52487 | 22.79246 | 25.34529 | 20.88167 | 29.87004 | 23.58018 | 34.67382 | 27.8182  |
| 32.04878 | 22.06974 | 19.38313 | 18.56535 | 31.28372 | 32.49536 | 27.71575 | 23.67572 | 32.36065 | 26.35445 | 23.37499 | 29.62048 |
| 30.1849  | 22.13325 | 18.59871 | 18.52253 | 31.72653 | 21.57748 | 24.76396 | 22.25101 | 28.28125 | 27.84943 | 23.36357 | 30.24188 |
| 30.86692 | 25.06372 | 21.47405 | 21.31331 | 29.26595 | 22.91889 | 30.65248 | 22.36032 | 30.83155 | 50.30717 | 47.68349 | 35.09112 |
| 30.28427 | 19.98044 | 25.99862 |          | 33.96785 | 38.21604 | 38.6416  | 28.65778 | 43.62045 | 29.15586 | 21.37954 | 28.62114 |
| 27.03734 | 22.37679 | 25.99365 |          | 32.58503 | 20.64122 | 28.16318 | 28.2455  | 31.83975 | 28.93916 | 25.85325 | 28.22247 |
| 35.69506 | 21.02966 | 20.45232 |          | 33.91212 | 28.397   | 24.81315 | 29.57629 | 30.68147 | 27.27423 | 21.34633 | 22.82064 |
| 21.64719 | 23.60469 | 21.36569 |          | 30.89457 | 22.56277 | 25.55166 | 21.14516 | 30.43065 | 23.43691 | 30.46631 | 22.93244 |
| 33.70572 | 19.90565 | 23.56588 |          | 28.07372 | 25.09316 | 24.22389 | 19.92357 | 31.52267 | 22.43603 | 21.26155 | 21.84974 |
| 32.2243  | 22.38899 | 24.06352 |          | 34.55302 | 22.3714  | 24.32452 | 21.02588 | 27.14687 | 22.28437 | 21.33143 | 24.15175 |
| 24.72676 | 22.66337 | 22.07167 |          | 29.88922 | 22.92301 | 26.14431 | 22.08736 | 28.8132  | 35.25164 | 22.88775 |          |
| 26.68485 | 25.2151  | 23.24964 |          | 30.24686 | 20.83213 | 22.32498 | 19.95798 | 36.19432 | 24.69668 | 40.00644 |          |
| 31.95244 | 20.69973 | 21.52361 |          | 29.73586 | 26.05932 | 37.5488  | 24.02287 | 30.01381 | 26.12511 | 20.91188 |          |
| 33.1726  | 20.76992 | 21.65617 |          | 33.92555 | 20.73072 | 25.31588 | 40.98464 | 28.50138 | 37.79403 | 22.71168 |          |
| 29.09629 | 26.5844  | 25.04218 |          | 30.4887  | 35.17052 | 26.14903 |          | 30.17005 | 29.48938 | 26.29865 |          |
| 31.79699 | 30.2728  | 26.92279 |          | 34.12785 | 22.73002 | 25.54102 |          | 31.51246 | 24.5142  | 26.6372  |          |
| 32.50629 | 24.15291 | 28.34849 |          | 30.96979 | 23.60558 | 39.89298 |          | 33.65321 | 24.87065 | 23.98526 |          |
| 35.9587  | 28.58462 | 26.94102 |          | 34.24729 | 26.79332 | 26.64753 |          | 31.92728 | 28.49863 |          |          |
| 33.61801 | 20.75281 |          |          | 29.36509 | 35.65861 | 24.30282 |          | 34.05332 | 22.12761 |          |          |
| 33.37497 | 20.02741 |          |          | 36.44406 | 19.78538 | 22.60809 |          | 29.80411 | 26.77381 |          |          |
| 28.82003 | 37.81176 |          |          | 27.64517 | 40.85843 | 24.95831 |          | 32.86831 | 26.29782 |          |          |
| 29.11168 | 23.06705 |          |          | 36.3253  | 33.62655 |          |          | 32.12461 |          |          |          |
| 31.59269 | 36.6495  |          |          | 34.53774 | 28.67188 |          |          | 29.16525 |          |          |          |
| 29.55602 | 21.78213 |          |          | 33.65268 |          |          |          | 32.86319 |          |          |          |
| 29.54752 | 20.52445 |          |          | 37.0113  |          |          |          | 32.76623 |          |          |          |
| 21.62426 |          |          |          | 34.96614 |          |          |          | 36.50211 |          |          |          |
| 32.23436 |          |          |          | 30.97642 |          |          |          | 27.90042 |          |          |          |
| 31.68853 |          |          |          | 31.91005 |          |          |          | 32.20184 |          |          |          |
| 25.79007 |          |          |          | 30.73285 |          |          |          | 32.9005  |          |          |          |
| 25.64769 |          |          |          | 32.8568  |          |          |          | 28.62368 |          |          |          |
| 29.50065 |          |          |          | 37.62762 |          |          |          | 28.48479 |          |          |          |
| 27.96455 |          |          |          | 33.45135 |          |          |          | 30.58698 |          |          |          |
| 31.64053 |          |          |          | 25.43767 |          |          |          | 36.31813 |          |          |          |
| 33.89303 |          |          |          | 29.56477 |          |          |          | 33.50812 |          |          |          |
|          |          |          |          | 27.24875 |          |          |          | 28.12696 |          |          |          |
|          |          |          |          | 31.69321 |          |          |          | 31.51055 |          |          |          |
|          |          |          |          | 34.03789 |          |          |          | 29.87004 |          |          |          |
|          |          |          |          | 33.52487 |          |          |          |          |          |          |          |
